# Supplementary material
Source: PubMed Central journal article supplement (PMC2674761)

# Synthesis of Six-Membered Metallodendrimers via [3+3] Coordination-Driven Self-Assembly

Hai-Bo Yang,<sup>\*,†</sup> Brian H. Northrop,<sup>‡</sup> Yao-Rong Zheng,<sup>‡</sup> Koushik Ghosh,<sup>‡</sup> Matthew M. Lyndon,<sup>§</sup>  
David C. Muddiman,<sup>§</sup> Peter J. Stang<sup>\*,‡</sup>

<sup>†</sup>Shanghai Key Laboratory of Green Chemistry and Chemical Processes, Department of Chemistry, East China Normal University, 3663 N. Zhongshan Road, Shanghai, China, 200062, <sup>‡</sup>Department of Chemistry, University of Utah, 315 South 1400 East, Room, 2020, Salt Lake City, Utah 84112, and <sup>§</sup>W. M. Keck FT-ICR Mass Spectrometry Laboratory and Department of Chemistry, North Carolina State University, Raleigh, North Carolina 27695

*hbyang@chem.ecnu.edu.cn, stang@chem.utah.edu*

## Table of Contents

|                                                                                 |     |
|---------------------------------------------------------------------------------|-----|
| Experimental Section.....                                                       | S2  |
| Multinuclear NMR Spectra of <b>2</b> , <b>4</b> , <b>5</b> , and <b>6</b> ..... | S7  |
| Molecular Modeling Figures of [G1] and [G2] Metallodendrimers <b>6a-b</b> ..... | S24 |

\* To whom correspondence should be addressed.

## General Experimental Methods

Diethylamine was distilled from sodium hydroxide and toluene was distilled from Na(s)/benzophenone. *trans*-PtI<sub>2</sub>(PEt<sub>3</sub>)<sub>2</sub> was prepared according to literature procedures.<sup>1</sup> NMR solvents (CD<sub>2</sub>Cl<sub>2</sub>) and all other reagents were purchased and used without further purification. The <sup>1</sup>H and <sup>13</sup>C NMR chemical shifts are reported relative to residual solvent signals, and <sup>31</sup>P {1H} NMR resonance is referenced to an external unlocked sample of 85% H<sub>3</sub>PO<sub>4</sub> (δ 0.0).

**General procedure for the synthesis of 4a-c.** To a solution of dendritic carboxylic acid (for G1, 353 mg, 1.06 mmol; for G2, 213 mg, 0.28 mmol; for G3, 246 mg, 0.153 mmol) in anhydrous dichloromethane (for G1, 5.0 ml; for G2, 3.0 ml; for G3, 2.0 ml) were added a catalytic amount (10 %) of DMAP and 3, 5-diethynyl-phenol **3** (for G1, 150 mg, 1.06 mmol; for G2, 39.8 mg, 0.28 mmol; for G3, 22 mg, 0.154 mmol). DCC (for G1, 221 mg, 1.06 mmol; for G2, 62 mg, 0.30 mmol; for G3, 33 mg, 0.16 mmol) was then added to the reaction mixture at 0 °C, followed by stirring for 5 min at 0 °C and 3 h at room temperature. Precipitated urea was then filtered off, and the filtrate was evaporated under vacuum. The residue was taken up in 25 mL of CH<sub>2</sub>Cl<sub>2</sub>, washed twice with 0.5N HCl and with saturated NaHCO<sub>3</sub> solution, and then dried over MgSO<sub>4</sub>. The residue was purified by column chromatography on silica gel (acetone/hexane: ~1/2) to give compounds **4a-c**.

**4a.** Yield: 369 mg (colorless oil), 76%. <sup>1</sup>H NMR (CD<sub>2</sub>Cl<sub>2</sub>, 300 MHz): δ 7.52 (s, 1H), 7.35-7.46 (m, 14H), 6.89 (s, 1H), 5.12 (s, 4H), 3.21 (s, 2H). <sup>13</sup>C NMR (CD<sub>2</sub>Cl<sub>2</sub>, 75 MHz): δ 164.8, 160.5, 151.2, 137.0, 133.7, 131.4, 129.1, 128.7, 128.2, 126.5, 124.2, 109.4, 108.5,

81.6, 79.4, 70.9. HR-TOF-MS Calculated for  $C_{32}H_{23}O_4$  ( $M+H^+$ ): 459.1596, found: 459.1598.

**4b.** Yield: 200 mg (colorless oil), 81%.  $^1H$  NMR ( $CD_2Cl_2$ , 300 MHz):  $\delta$  7.52 (s, 1H), 7.32-7.43 (m, 24H), 6.86 (s, 1H), 6.93 (d,  $J = 2.1$  Hz, 4H), 6.57 (s, 2H), 5.06 (s, 4H), 5.04 (s, 8H), 3.21 (s, 2H).  $^{13}C$  NMR ( $CD_2Cl_2$ , 75 MHz):  $\delta$  164.8, 160.7, 160.4, 151.2, 139.5, 137.4, 133.7, 131.4, 129.1, 128.5, 128.1, 126.5, 124.3, 109.5, 108.4, 106.9, 102.1, 82.0, 79.4, 70.7, 70.6. HR-TOF-MS Calculated for  $C_{59}H_{46}O_8K$  ( $M+K^+$ ): 921.2830, found: 921.2849.

**4c.** Yield: 205 mg (colorless oil), 75%.  $^1H$  NMR ( $CD_2Cl_2$ , 300 MHz):  $\delta$  7.51 (s, 1H), 7.30-7.38 (m, 44H), 6.88 (s, 1H), 6.66 (d,  $J = 2.1$  Hz, 12H), 6.54 (s, 6H), 4.98-5.04 (m, 28H), 3.20 (s, 2H).  $^{13}C$  NMR ( $CD_2Cl_2$ , 75 MHz):  $\delta$  164.7, 160.7, 160.4, 151.2, 139.9, 139.7, 139.5, 137.5, 133.7, 131.4, 129.1, 128.7, 128.5, 128.1, 126.5, 124.2, 109.5, 108.3, 106.8, 102.1, 101.9, 82.0, 79.4, 70.7, 70.6, 70.5. HR-TOF-MS Calculated for  $C_{115}H_{94}O_{16}K$  ( $M+K^+$ ): 1769.6179, found: 1769.6199.

**General procedure for the synthesis of 5a-c.** To a 50 mL round-bottom Schlenk flask were added *trans*-diiodobis(triethylphosphine)platinum (for G1, 1.76 g, 2.56 mmol; for G2, 0.54 g, 0.792 mmol; for G3, 323 mg, 0.472 mmol) and **4a-c** (**4a**, 295 mg, 0.64 mmol; **4b**, 175 mg, 0.198 mmol; **4c**, 205 mg, 0.118 mmol). Then the mixture solvent of toluene (for G1, 15 mL; for G2, 10 mL; for G3, 5 mL) and dry diethylamine (for G1, 8 mL; for G2, 6 mL; for G3, 5 mL) were added under nitrogen. The solution was stirred for 10 min at room temperature before cuprous iodide (for **4a**, 37 mg; for **4b**, 12 mg; for **4c**, 10 mg) was added in one portion. After 12 h at room temperature, a small amount of diethylammonium iodide started precipitating out of solution. The solvent was removed

under vacuum and the resulting yellow residue was separated by column chromatography on silica gel with a solvent mixture of hexane/DCM (~2/1) to give the product of **5a-c**.

**5a**, Yield: 0.84 g (pale yellow solid), 83%. mp 218-219 °C. <sup>1</sup>H NMR (CD<sub>2</sub>Cl<sub>2</sub>, 300 MHz): δ 7.32-7.46 (m, 12H), 7.09 (s, 1H), 6.88 (br, 3H), 5.12 (s, 4H), 2.18-2.23 (m, 24H), 1.10-1.21 (m, 36H). <sup>13</sup>C NMR (CD<sub>2</sub>Cl<sub>2</sub>, 75 MHz): δ 165.3, 160.5, 151.3, 137.1, 132.1, 131.1, 130.1, 129.1, 128.7, 128.2, 121.4, 109.3, 108.1, 99.6, 92.1, 70.9, 17.1, 8.6. <sup>31</sup>P{<sup>1</sup>H} NMR (CD<sub>2</sub>Cl<sub>2</sub>, 121.4 MHz): δ 11.26 (s, <sup>1</sup>J<sub>Pt-P</sub> = 2314.9 Hz). MS (ESI) *m/z*: 1573.2 [M+H]<sup>+</sup>. Anal. Calcd for C<sub>55</sub>H<sub>80</sub>I<sub>2</sub>O<sub>4</sub>P<sub>4</sub>Pt<sub>2</sub>: C, 41.99; H, 5.13; Found: C, 42.18; H, 5.10.

**5b**, Yield: 310 mg (pale yellow solid), 79%. mp 171-172 °C. <sup>1</sup>H NMR (CD<sub>2</sub>Cl<sub>2</sub>, 300 MHz): δ 7.32-7.43 (m, 22H), 7.10 (s, 1H), 6.89 (s, 2H), 6.85 (s, 1H), 6.69 (d, *J* = 2.1 Hz, 4H), 6.57 (t, *J* = 2.1 Hz, 2H), 5.07 (s, 4H), 5.04 (s, 8H), 2.17-2.23 (m, 24H), 1.10-1.20 (m, 36H). <sup>13</sup>C NMR (CD<sub>2</sub>Cl<sub>2</sub>, 75 MHz): δ 165.2, 160.7, 160.4, 151.3, 139.5, 137.4, 132.1, 131.1, 130.1, 129.1, 128.5, 128.1, 121.4, 109.4, 108.0, 106.8, 102.0, 99.6, 70.6, 17.1, 8.6. <sup>31</sup>P{<sup>1</sup>H} NMR (CD<sub>2</sub>Cl<sub>2</sub>, 121.4 MHz): δ 11.37 (s, <sup>1</sup>J<sub>Pt-P</sub> = 2314.9 Hz). MS (ESI) *m/z*: 1997.4 [M+H]<sup>+</sup>. Anal. Calcd for C<sub>83</sub>H<sub>104</sub>I<sub>2</sub>O<sub>8</sub>P<sub>4</sub>Pt<sub>2</sub>: C, 49.91; H, 5.25; Found: C, 50.31; H, 5.45.

**5c** Yield: 251 mg (pale yellow glassy solid), 75%. mp 72-73 °C. <sup>1</sup>H NMR (CD<sub>2</sub>Cl<sub>2</sub>, 300 MHz): δ 7.30-7.42 (m, 42H), 7.09 (s, 1H), 6.89 (br, 3H), 6.67 (d, *J* = 2.1 Hz, 12H), 6.54 (s, 6H), 4.98-5.04 (m, 28H), 2.17-2.23 (m, 24H), 1.10-1.20 (m, 36H). <sup>13</sup>C NMR (CD<sub>2</sub>Cl<sub>2</sub>, 75 MHz): δ 165.3, 160.7, 160.5, 151.3, 139.9, 139.7, 139.5, 137.5, 132.1, 131.1, 130.1, 129.1, 128.7, 128.5, 128.1, 121.4, 109.4, 107.9, 106.8, 102.1, 101.9, 99.6, 92.2, 70.6, 70.5, 17.1, 8.6. <sup>31</sup>P{<sup>1</sup>H} NMR (CD<sub>2</sub>Cl<sub>2</sub>, 121.4 MHz): δ 11.28 (s, <sup>1</sup>J<sub>Pt-P</sub> = 2314.9 Hz). MS (ESI)

$m/z$ : 2845.7  $[M+H]^+$ . Anal. Calcd for  $C_{139}H_{152}I_2O_{16}P_4Pt_2$ : C, 58.65; H, 5.38; Found: C, 58.31; H, 5.74.

**General procedure for the synthesis of 2a-c.** A 50 ml round bottom Schlenk flask was charged with 0.053 mmol diiodic complex **5a-c** (**5a**, 83 mg, 0.0528 mmol; **5b**, 106 mg, 0.0530 mmol; **5c**, 151 mg, 0.0531 mmol) and 15 ml of dichloromethane. To the solution, 30 mg (0.117 mmol) of AgOTf were added at once, resulting in a yellowish precipitate of AgI. After 4 h at room temperature the suspension was filtered through a glass fiber filter and the volume of the solution reduced to 5 ml. Subsequent addition of diethylether resulted in the precipitation of the bistriflate salt **2a-c**.

**2a** Yield: 80 mg (pale yellow solid), 93%. mp 90-91°C.  $^1H$  NMR ( $CD_2Cl_2$ , 300 MHz):  $\delta$  7.35-7.46 (m, 12H), 7.09 (br, 1H), 6.85-6.89 (m, 3H), 5.12 (s, 4H), 2.03-2.08 (m, 24H), 1.16-1.27 (m, 36H).  $^{31}P\{^1H\}$  NMR ( $CD_2Cl_2$ , 121.4 MHz):  $\delta$  22.18 (s,  $^1J_{Pt-P} = 2361.4$  Hz). MS (ESI)  $m/z$ : 1467.4  $[M-OTf]^+$ . Anal. Calcd for  $C_{57}H_{80}F_6O_{10}P_4Pt_2S_2$ : C, 42.33; H, 4.99; Found: C, 42.06; H, 5.08.

**2b** Yield: 102 mg (pale yellow glassy solid), 94%. mp 87-89°C.  $^1H$  NMR ( $CD_2Cl_2$ , 300 MHz):  $\delta$  7.32-7.43 (m, 22H), 6.95 (s, 1H), 6.85 (s, 1H), 6.83 (s, 2H), 6.69 (d,  $J = 2.1$  Hz, 4H), 6.57 (s, 2H), 5.06 (s, 4H), 5.04 (s, 8H), 2.02-2.06 (m, 24H), 1.15-1.26 (m, 36H).  $^{31}P\{^1H\}$  NMR ( $CD_2Cl_2$ , 121.4 MHz):  $\delta$  22.65 (s,  $^1J_{Pt-P} = 2373.5$  Hz). MS (ESI)  $m/z$ : 1891.6  $[M-OTf]^+$ . Anal. Calcd for  $C_{85}H_{104}F_6O_{14}P_4Pt_2S_2$ : C, 50.00; H, 5.13; Found: C, 49.78; H, 5.41.

**2c** Yield: 144 mg (pale yellow glassy solid), 94%. mp 69-70°C.  $^1H$  NMR ( $CD_2Cl_2$ , 300 MHz):  $\delta$  7.34-7.39 (m, 42H), 6.90-6.93 (m, 4H), 6.68 (s, 12H), 6.56 (s, 6H), 4.98-5.02 (m, 28H), 2.04 (br, 24H), 1.17-1.27 (m, 36H).  $^{31}P\{^1H\}$  NMR ( $CD_2Cl_2$ , 121.4 MHz):  $\delta$  22.56

(s,  $^1J_{\text{Pt-P}} = 2372.4$  Hz). MS (ESI)  $m/z$ : 2739.9 [M-OTf]<sup>+</sup>. Anal. Calcd for C<sub>141</sub>H<sub>152</sub>F<sub>6</sub>O<sub>22</sub>P<sub>4</sub>Pt<sub>2</sub>S<sub>2</sub>: C, 58.58; H, 5.30; Found: C, 58.39; H, 5.47.

#### REFERENCES.

1. Stang, P. J.; Cao, D. H.; Saito, S.; Arif, A. M. *J. Am. Chem. Soc.* **1995**, *117*, 6273.

**Figure S1.**  $^1\text{H}$  (A) and  $^{13}\text{C}$  (B) NMR spectra of **4a** in  $\text{CD}_2\text{Cl}_2$

**A**

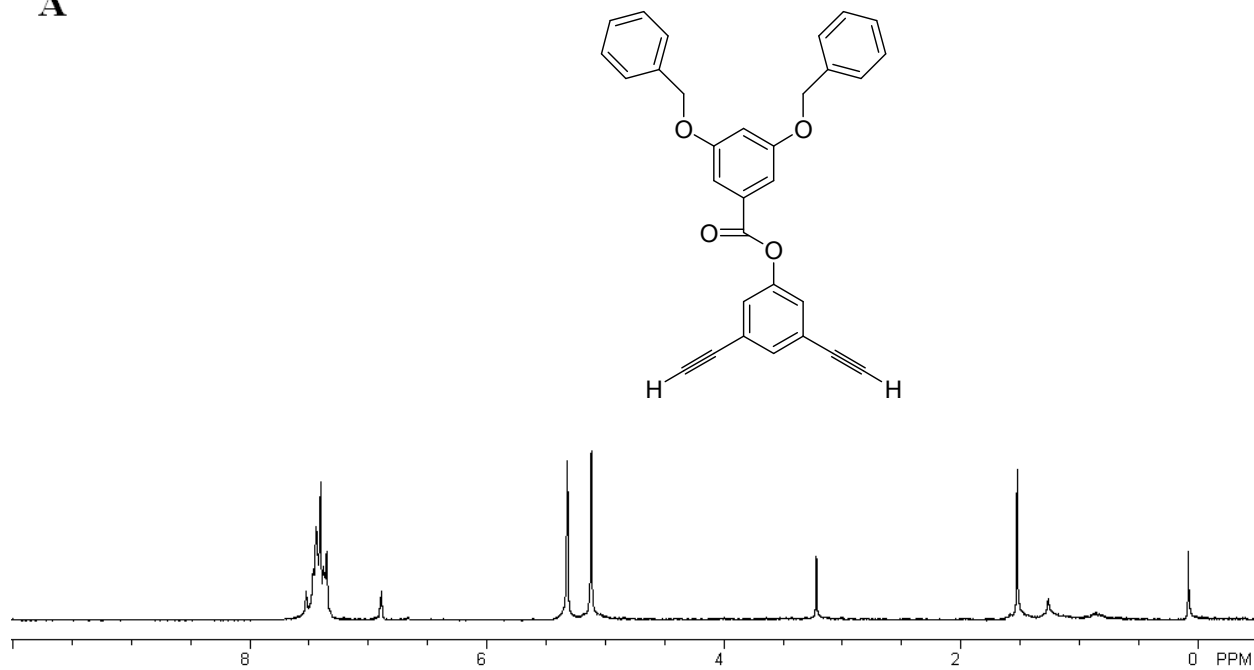

**B**

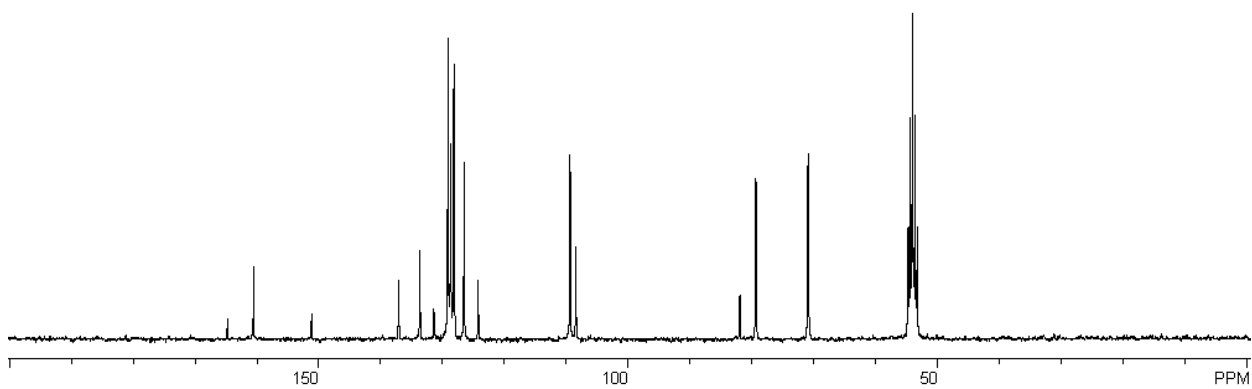

**Figure S2.**  $^1\text{H}$  (A),  $^{13}\text{C}$  (B), and  $^{31}\text{P}$  (C) NMR spectra of **5a** in  $\text{CD}_2\text{Cl}_2$

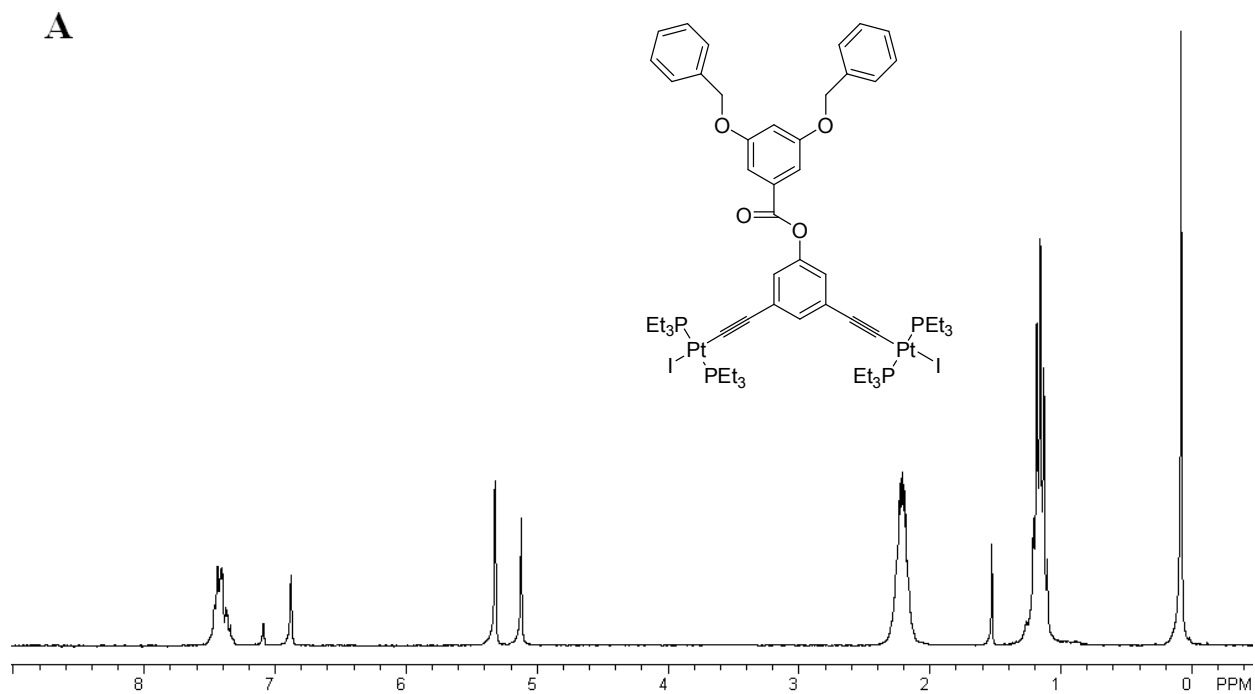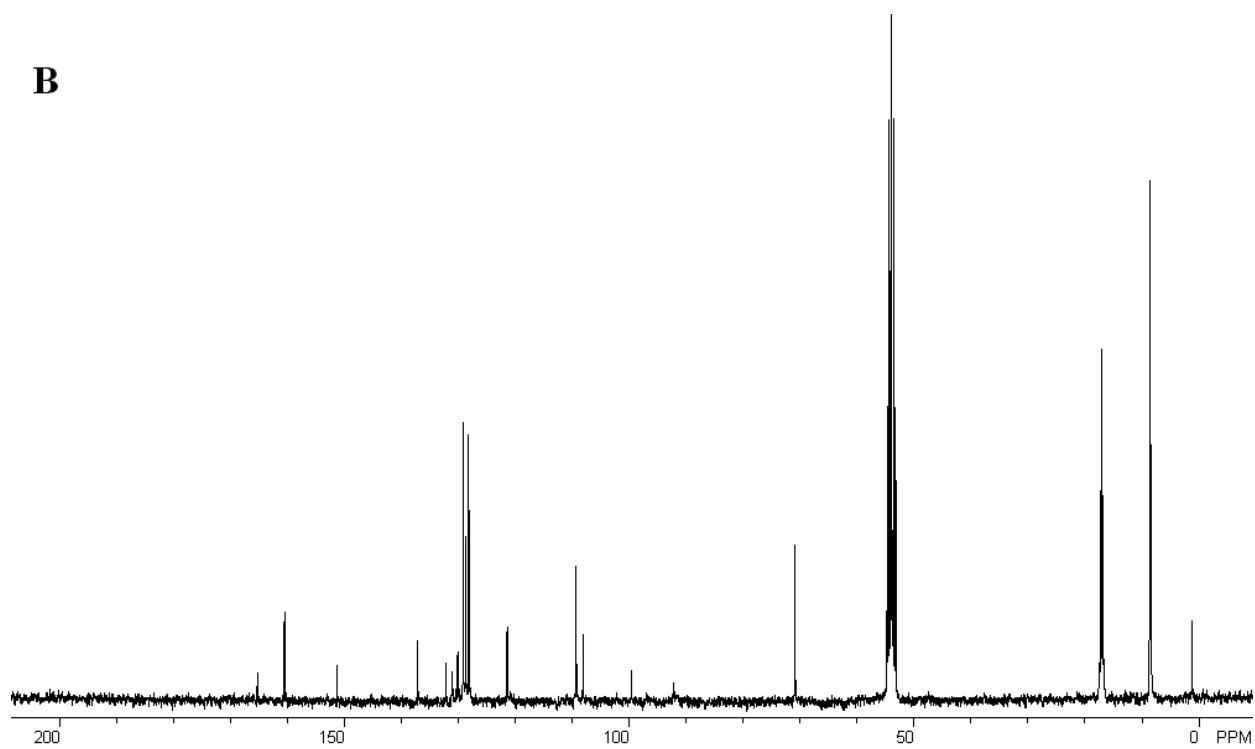



**C**

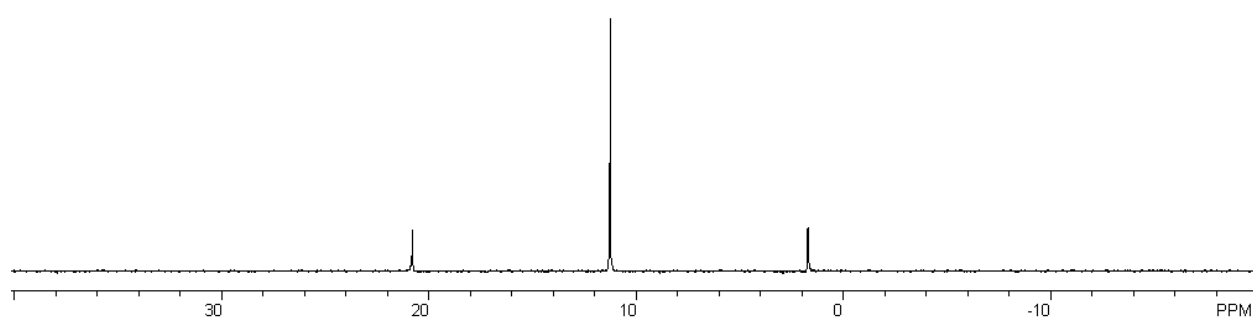

**Figure S3.**  $^1\text{H}$  (A) and  $^{31}\text{P}$  (B) NMR spectra of **2a** in  $\text{CD}_2\text{Cl}_2$

**A**

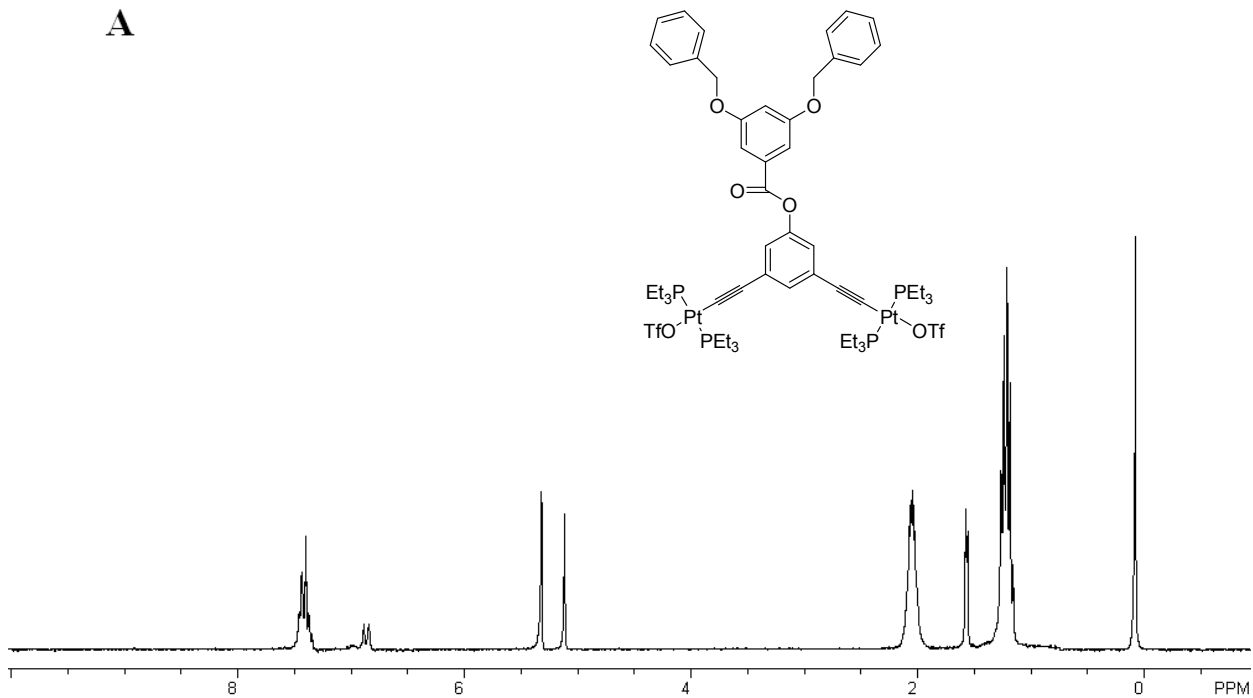

**B**

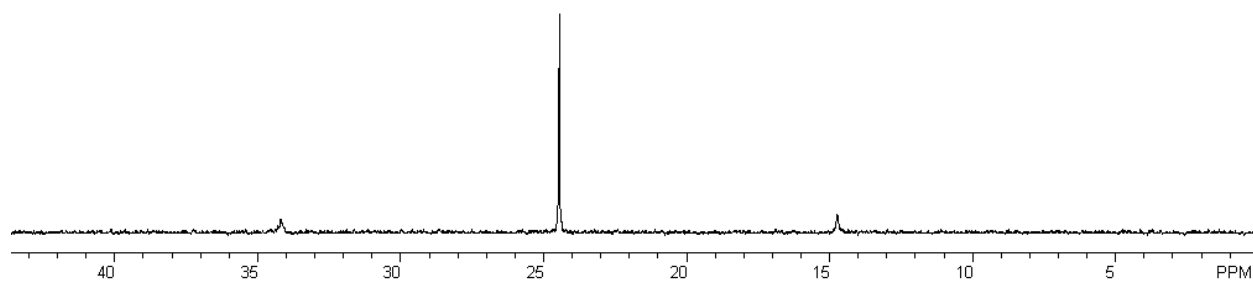

**Figure S4.**  $^1\text{H}$  (A) and  $^{13}\text{C}$  (B) NMR spectra of **4b** in  $\text{CD}_2\text{Cl}_2$

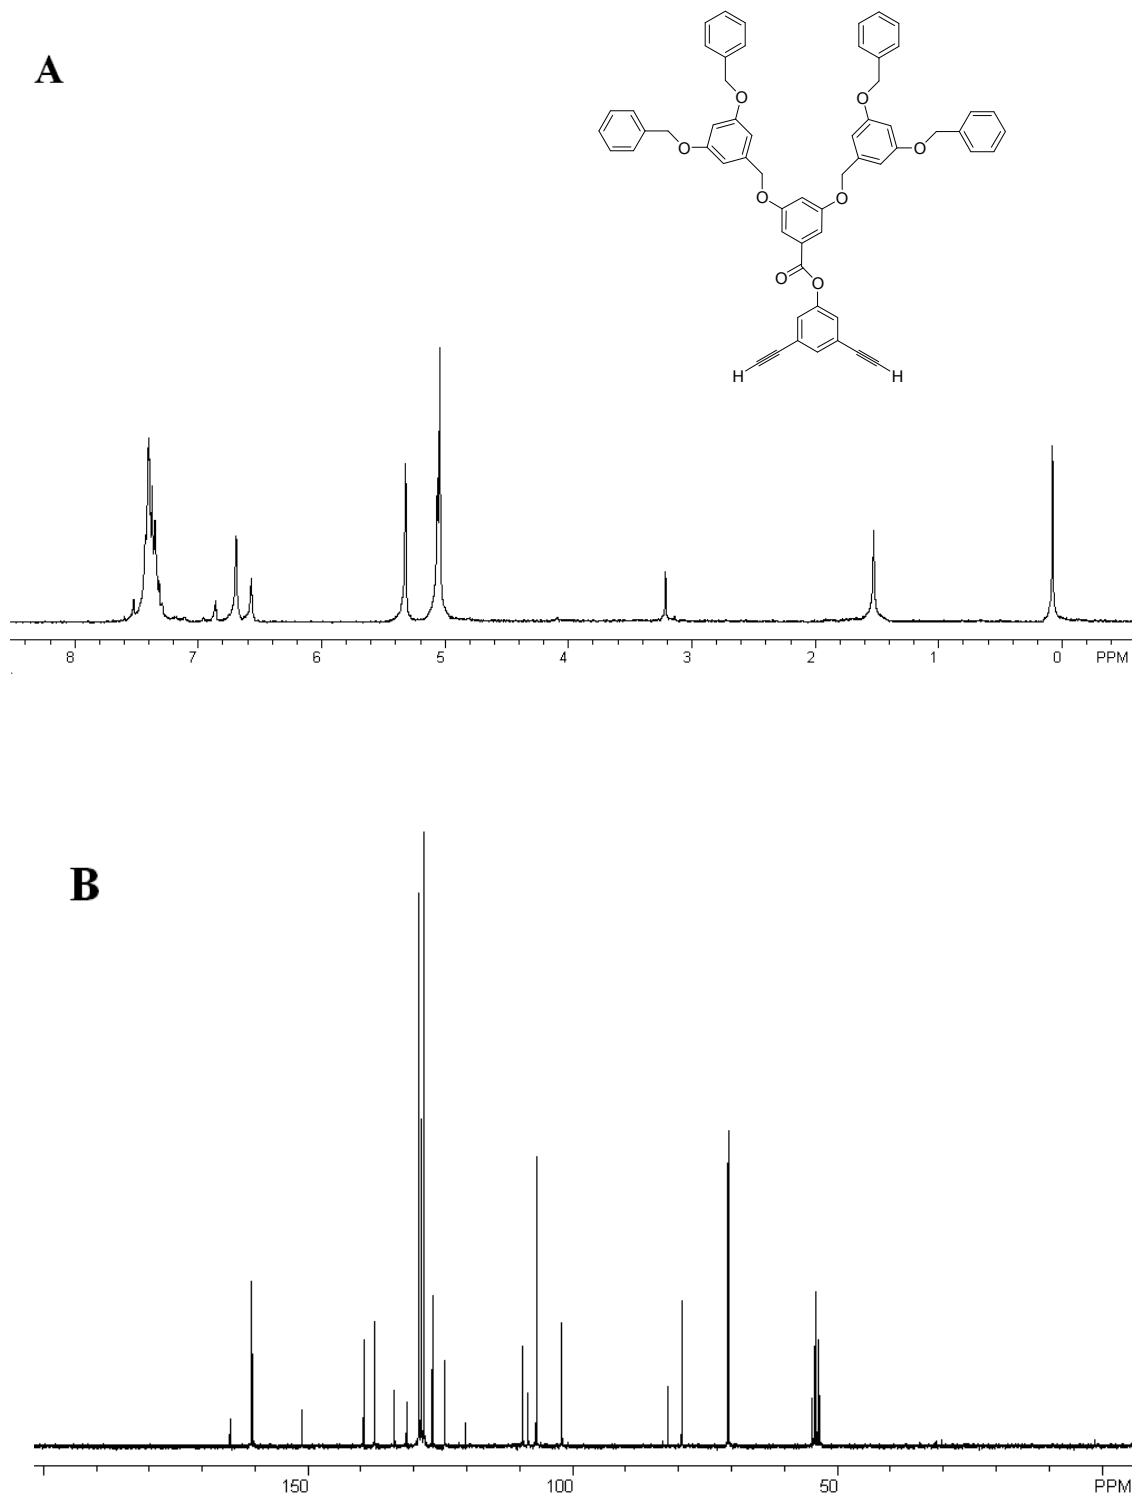

**Figure S5.**  $^1\text{H}$  (A),  $^{13}\text{C}$  (B), and  $^{31}\text{P}$ (C) NMR spectra of **5b** in  $\text{CD}_2\text{Cl}_2$

**A**

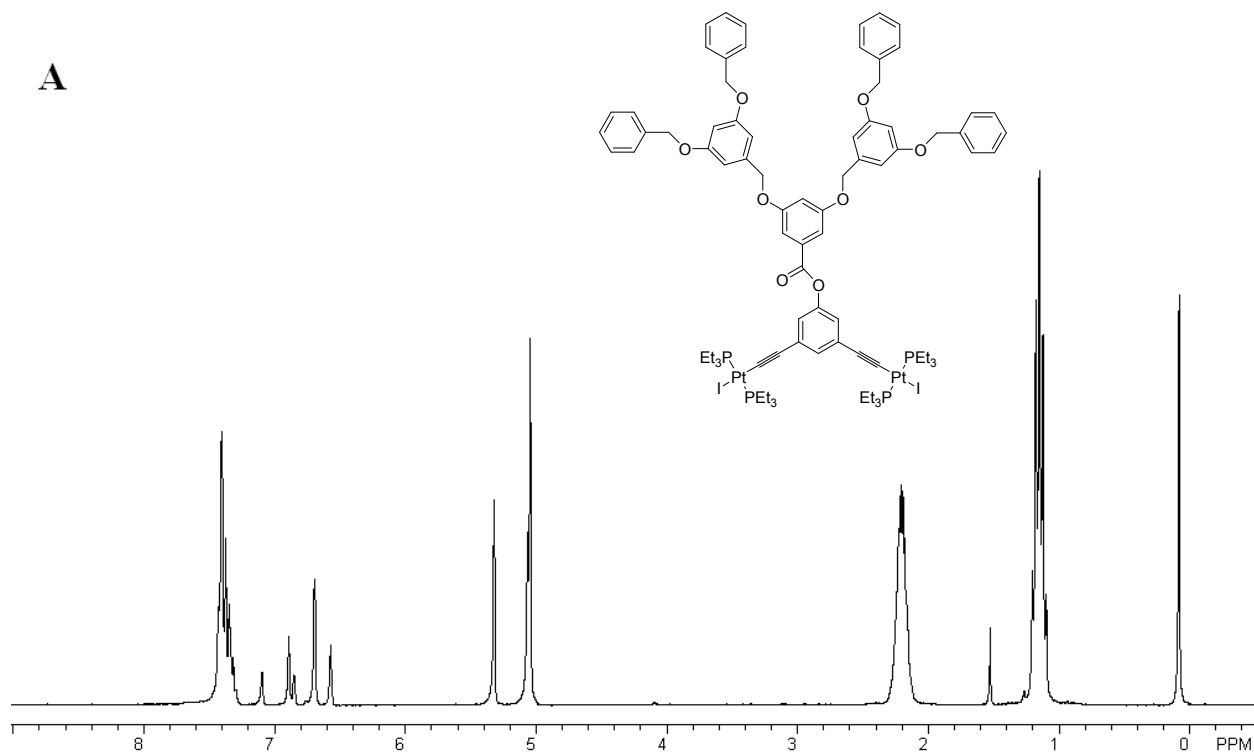

**B**

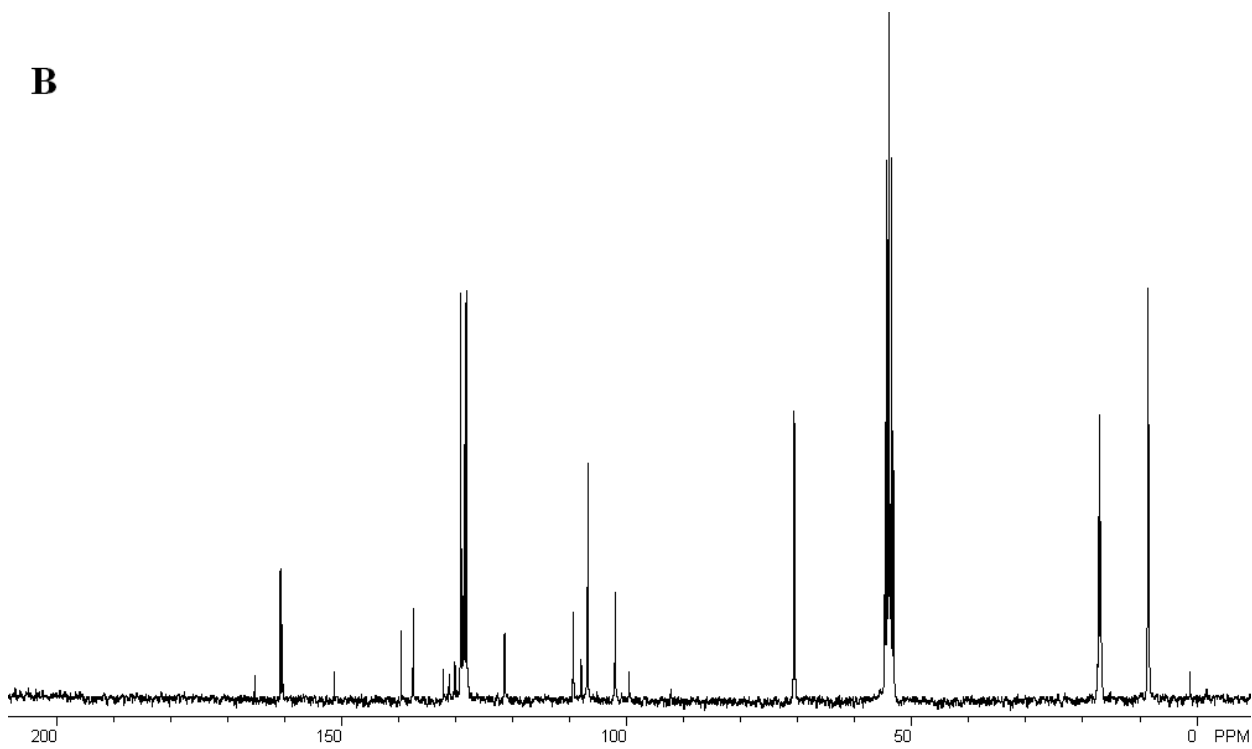

**C**

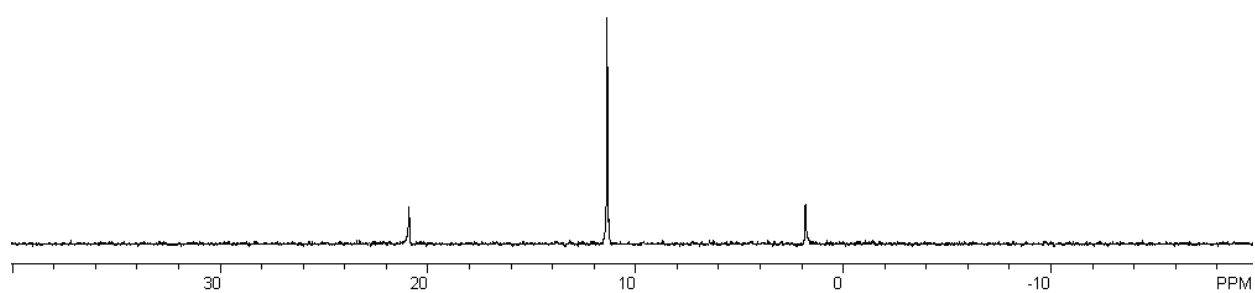

**Figure S6.**  $^1\text{H}$  (A) and  $^{31}\text{P}$  (B) NMR spectra of **2b** in  $\text{CD}_2\text{Cl}_2$

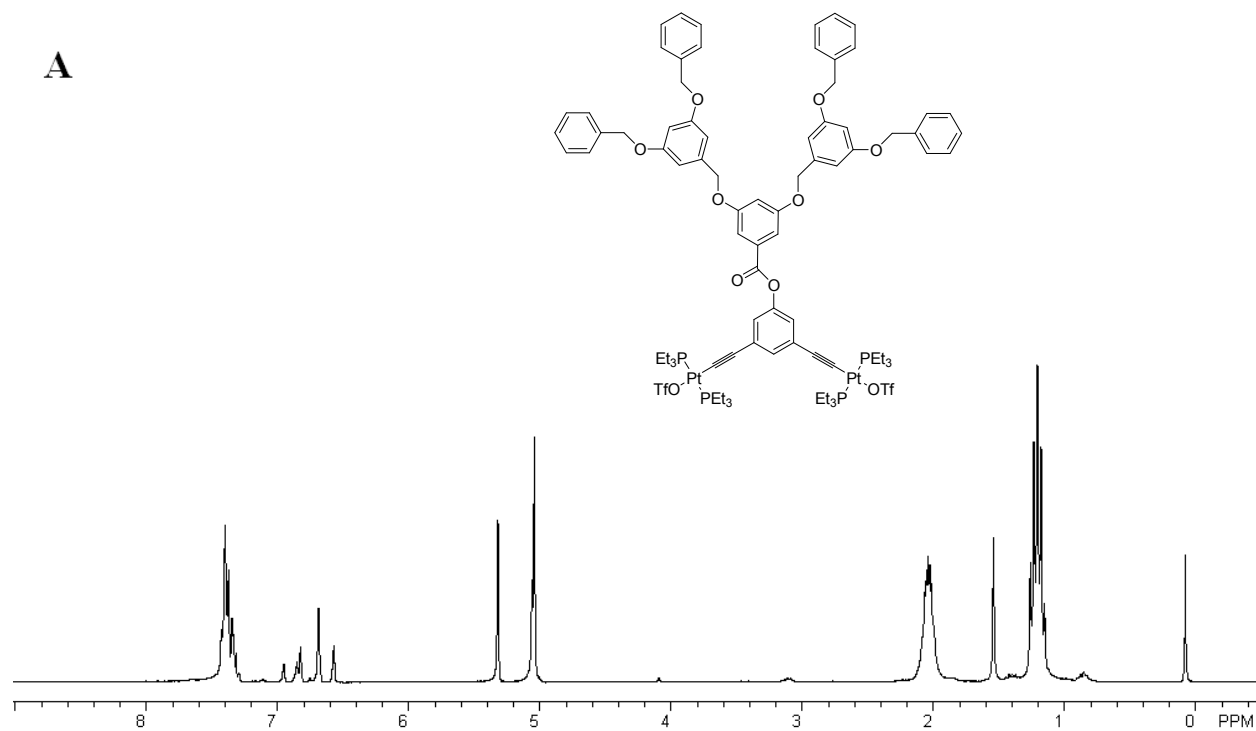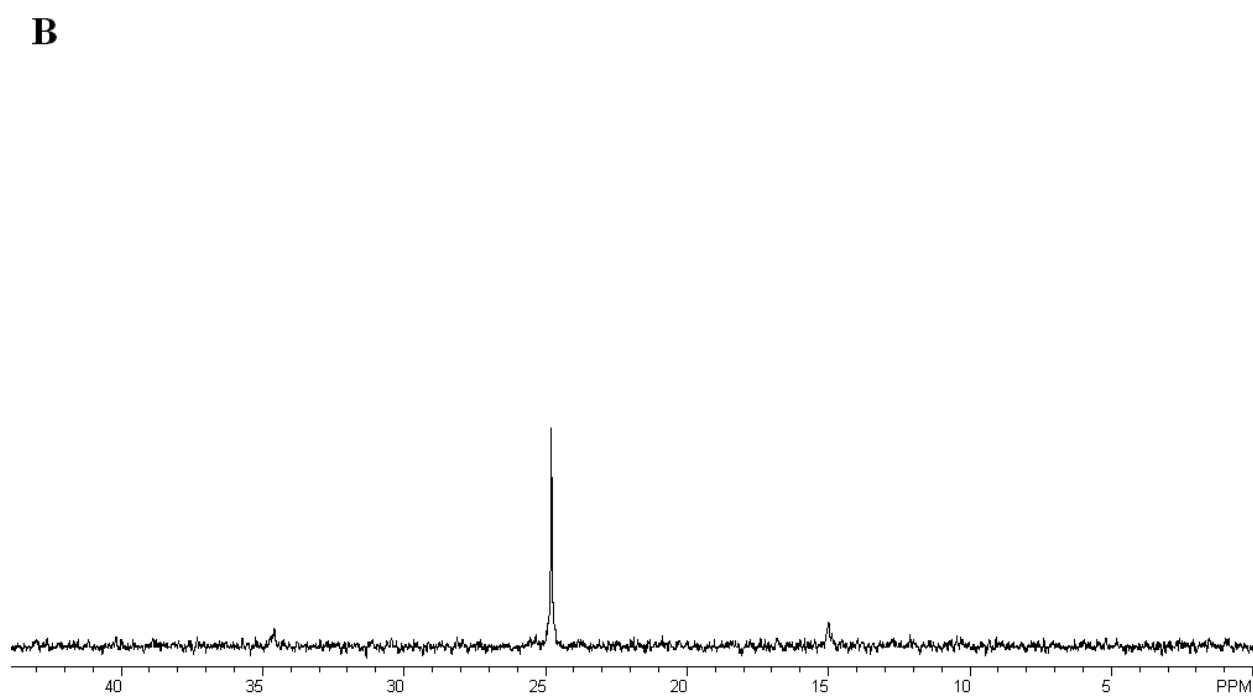

**Figure S7.**  $^1\text{H}$  (A) and  $^{13}\text{C}$  (B) NMR spectra of **4c** in  $\text{CD}_2\text{Cl}_2$

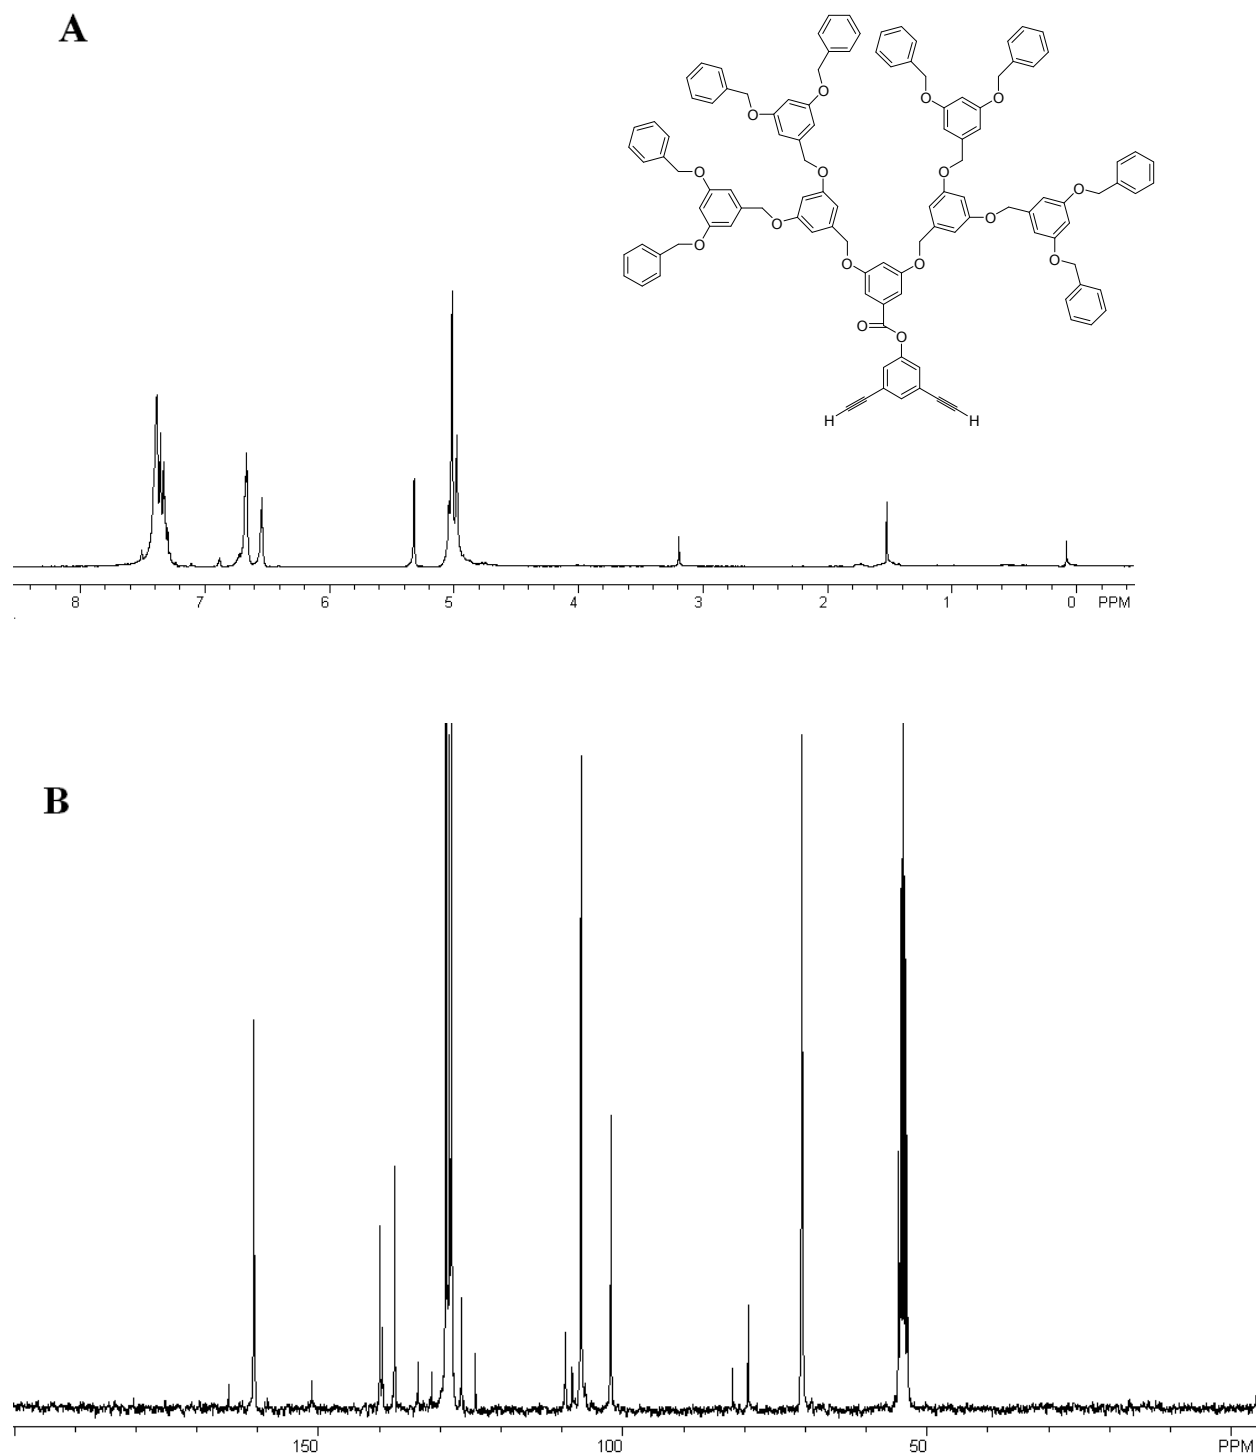

**Figure S8.**  $^1\text{H}$  (A),  $^{13}\text{C}$  (B), and  $^{31}\text{P}$ (C) NMR spectra of **5c** in  $\text{CD}_2\text{Cl}_2$

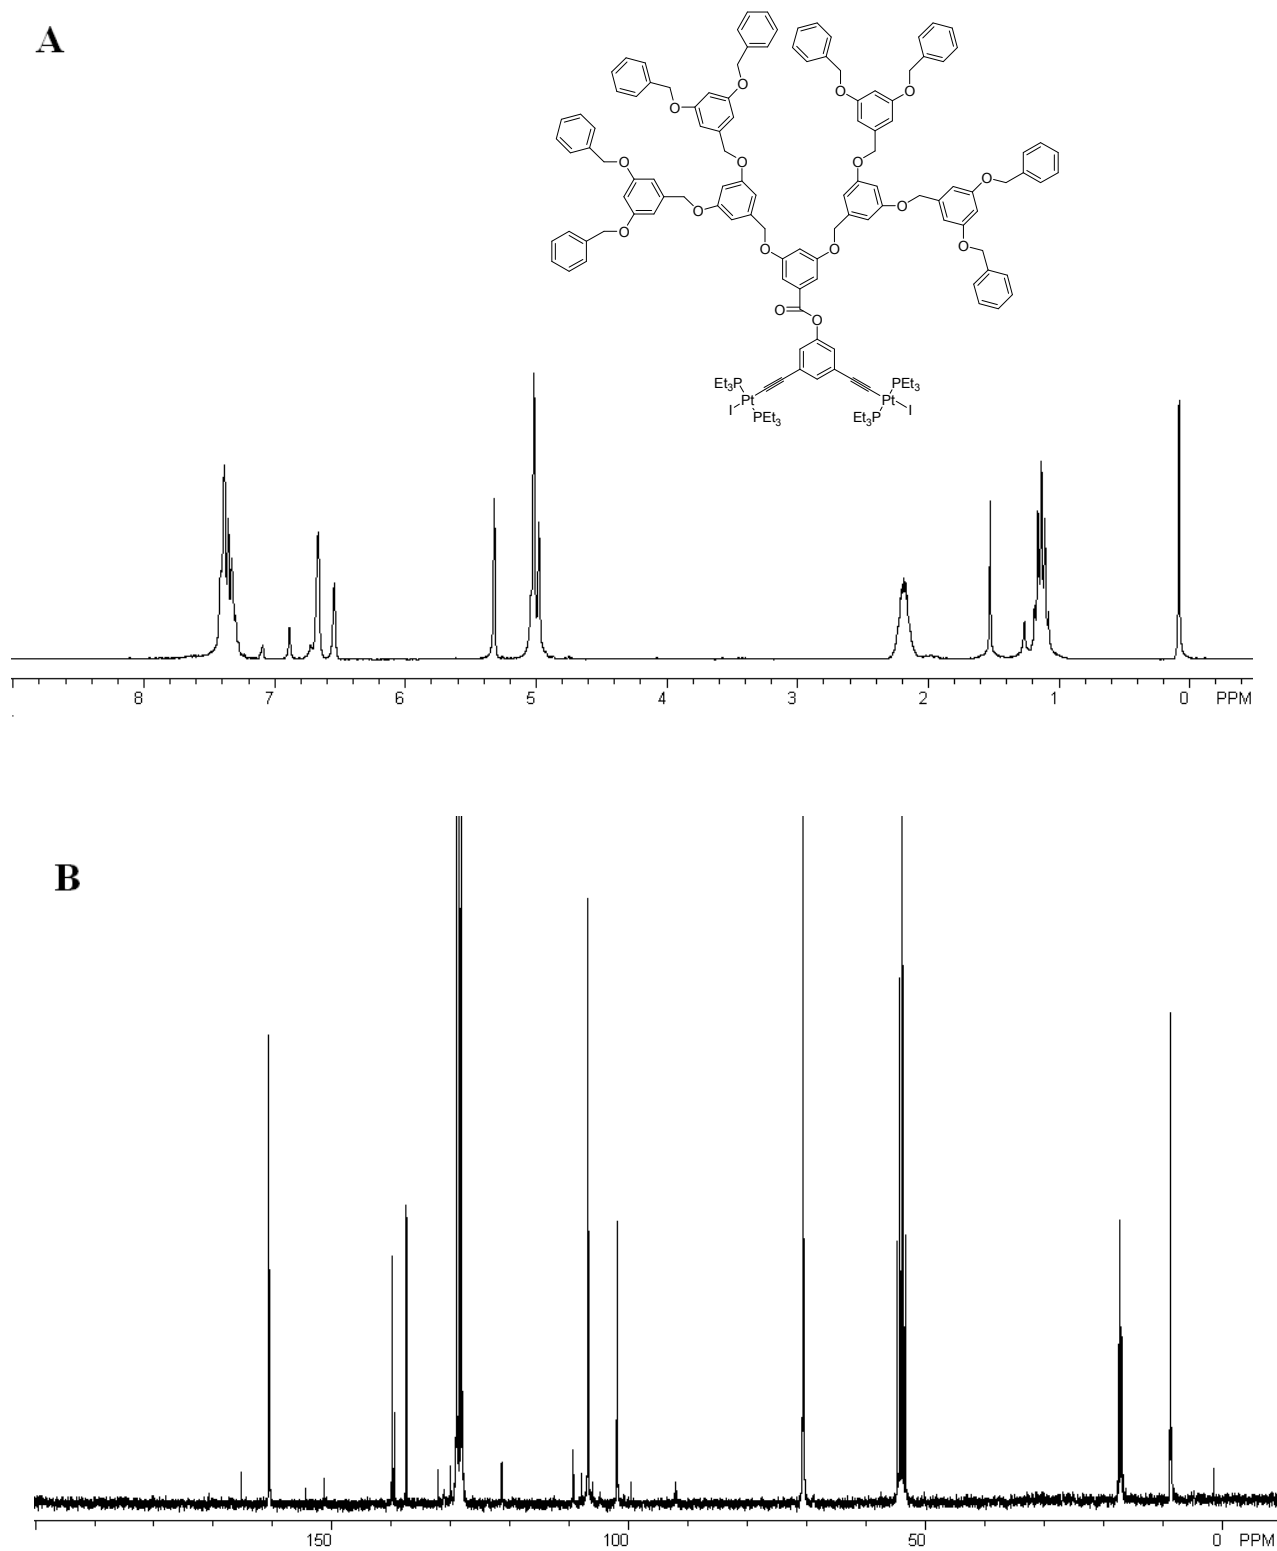



**C**

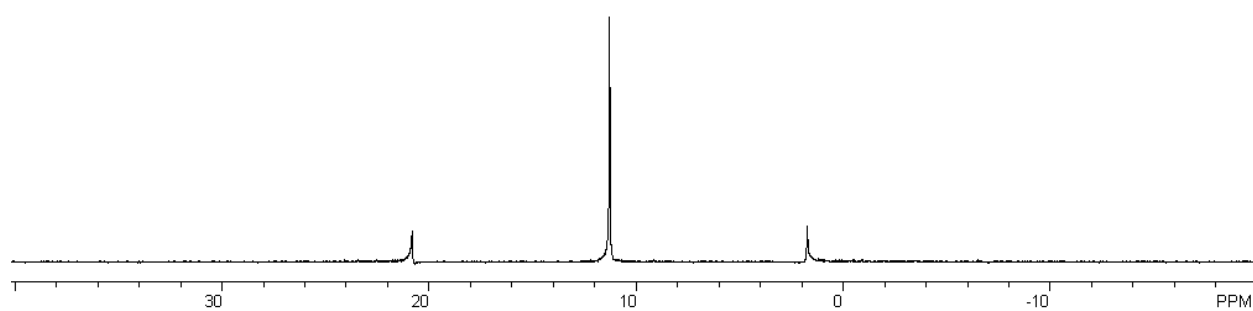

**Figure S9.**  $^1\text{H}$  (A) and  $^{31}\text{P}$  (B) NMR spectra of **2c** in  $\text{CD}_2\text{Cl}_2$

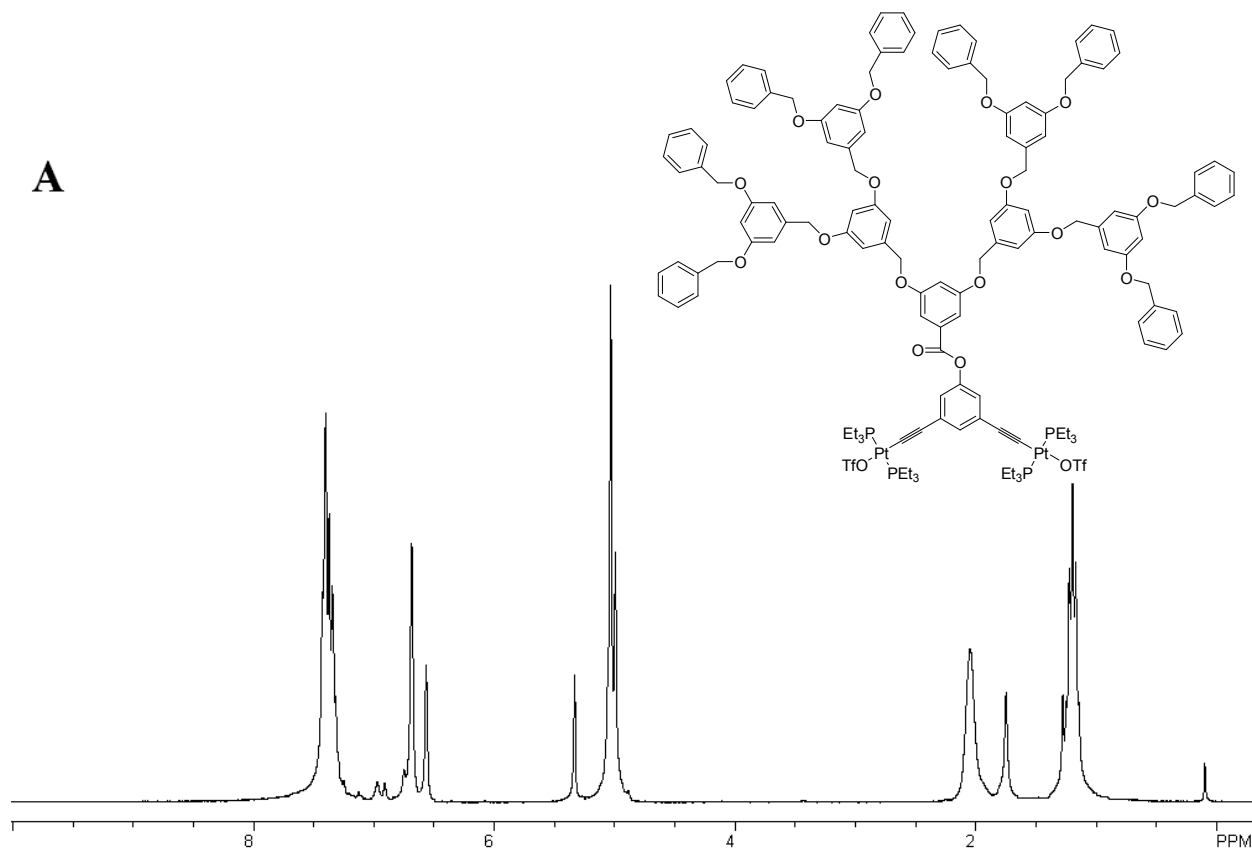

**B**

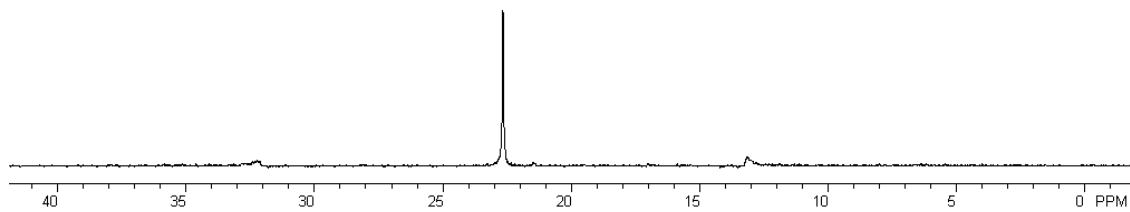

(A)

6+

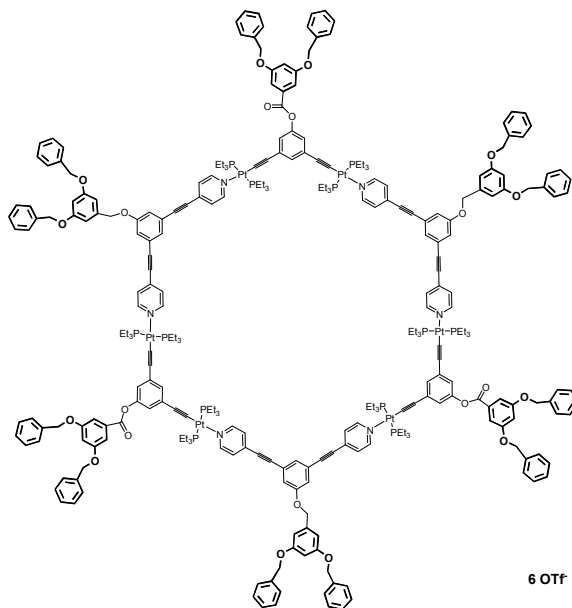

(B)

6+

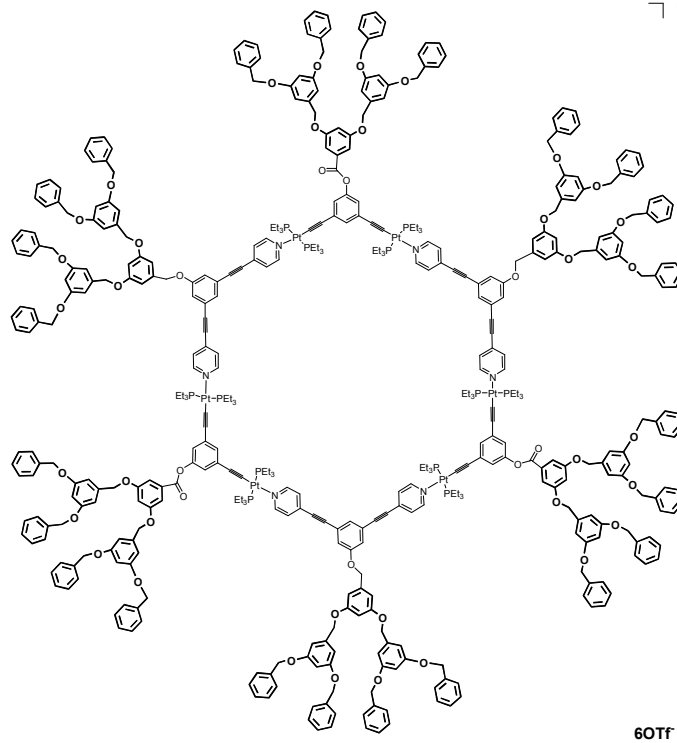

(C)

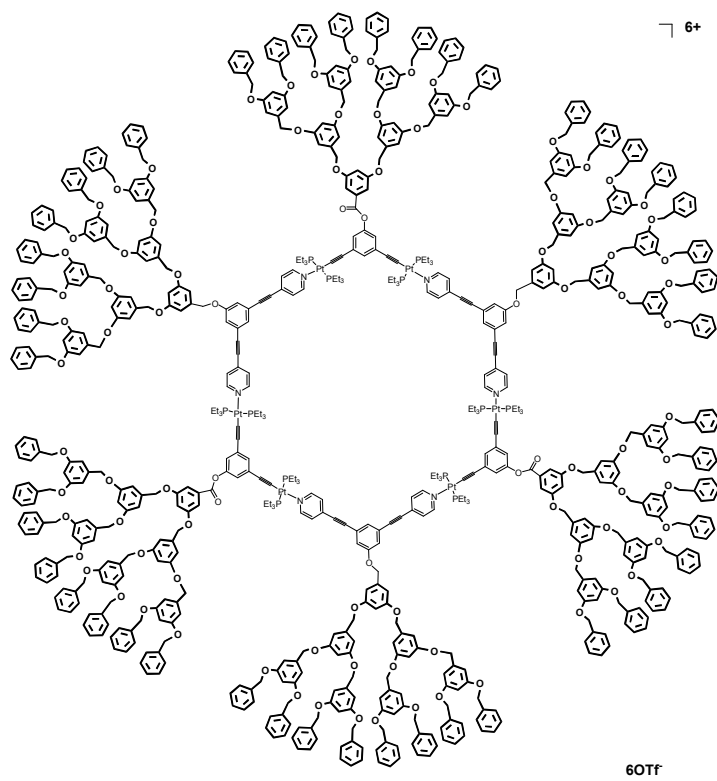

**Figure S10.** The molecular structure of metallodendrimers **6a**(A), **6b**(B), and **6c**(C).

**Figure S11.**  $^1\text{H}$  (A) and  $^{31}\text{P}$  (B) NMR spectra of **6a** in  $\text{CD}_2\text{Cl}_2$

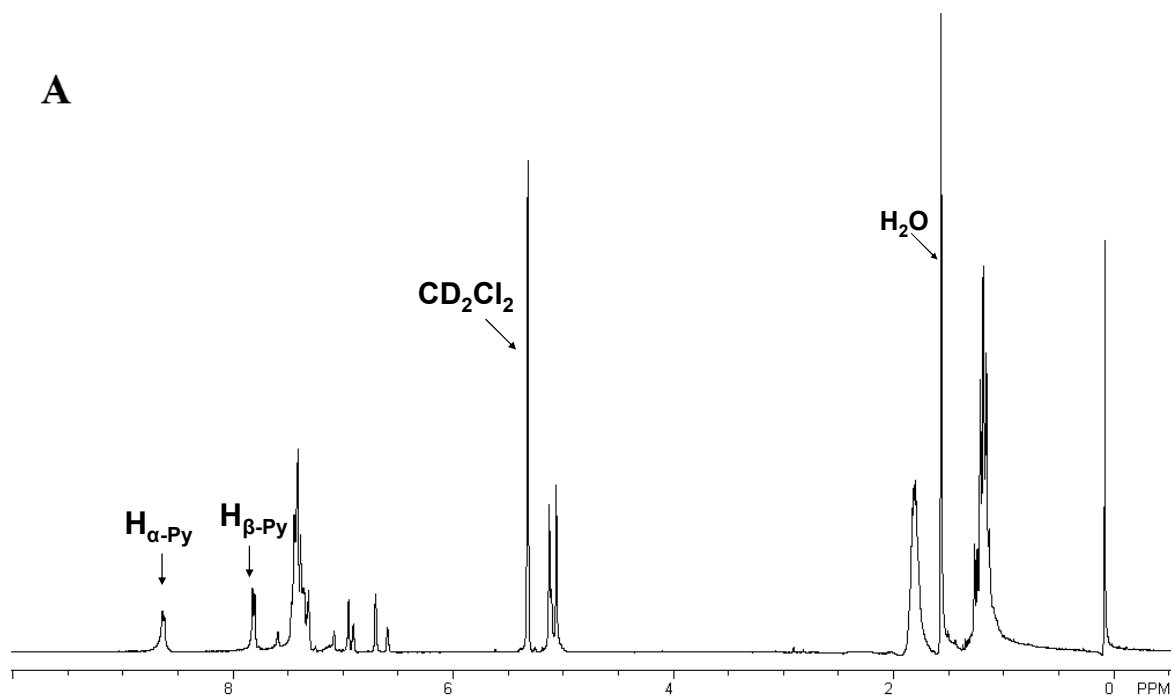

**B**

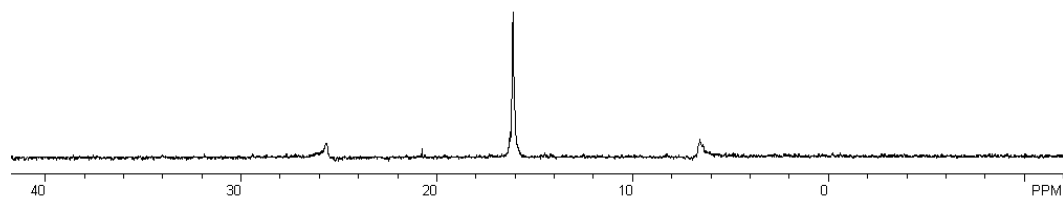

**Figure S12.**  $^1\text{H}$  (A) and  $^{31}\text{P}$  (B) NMR spectra of **6b** in  $\text{CD}_2\text{Cl}_2$

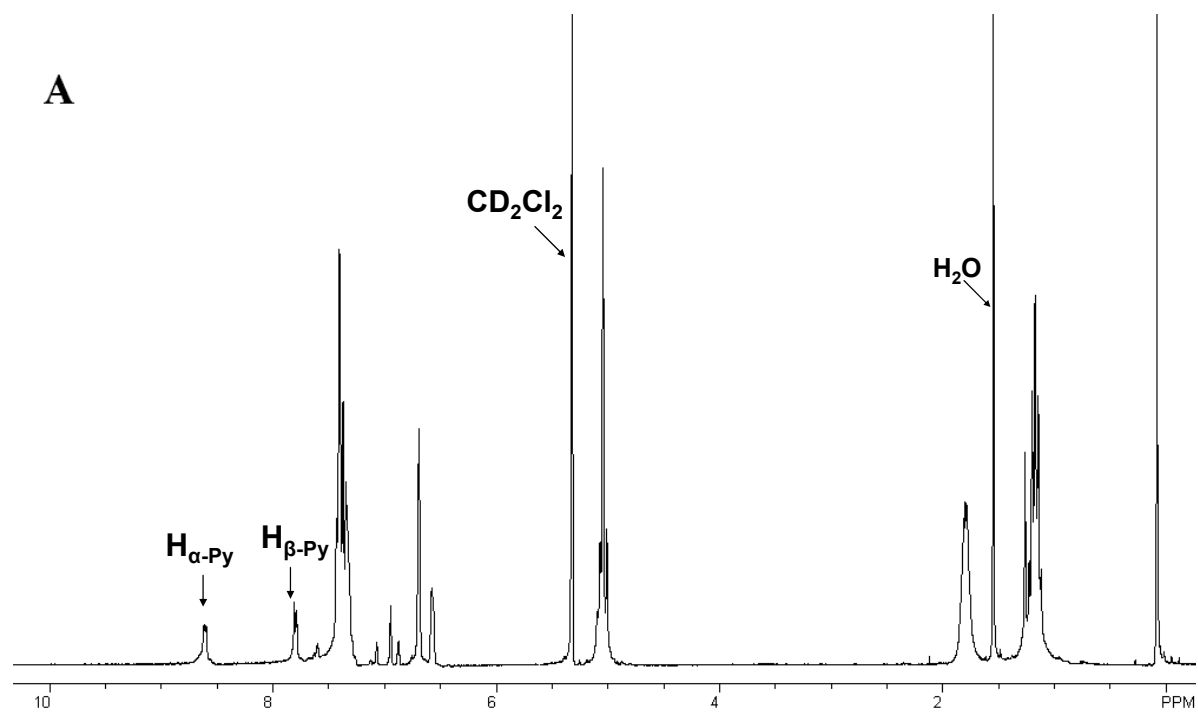

**B**

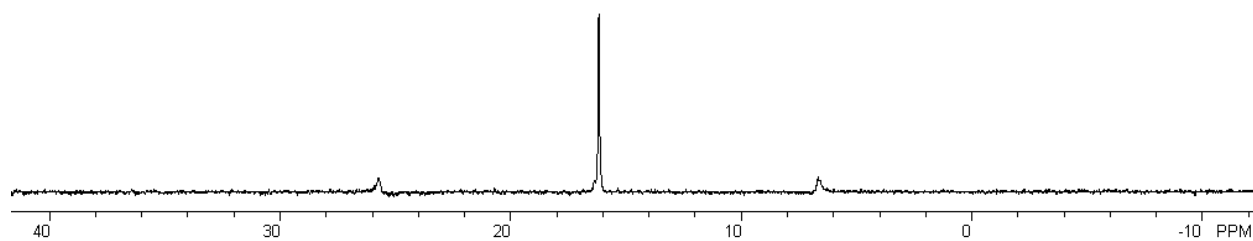

**Figure S13.**  $^1\text{H}$  (A) and  $^{31}\text{P}$  (B) NMR spectra of **6c** in  $\text{CD}_2\text{Cl}_2$

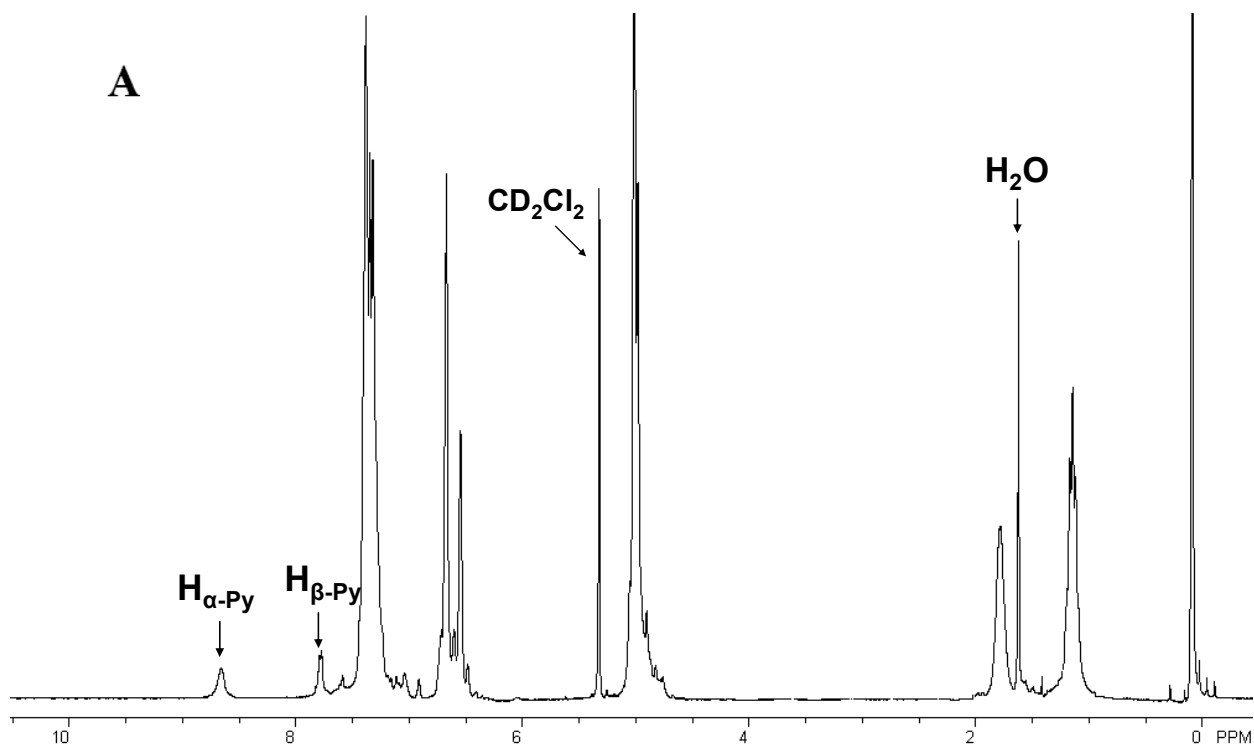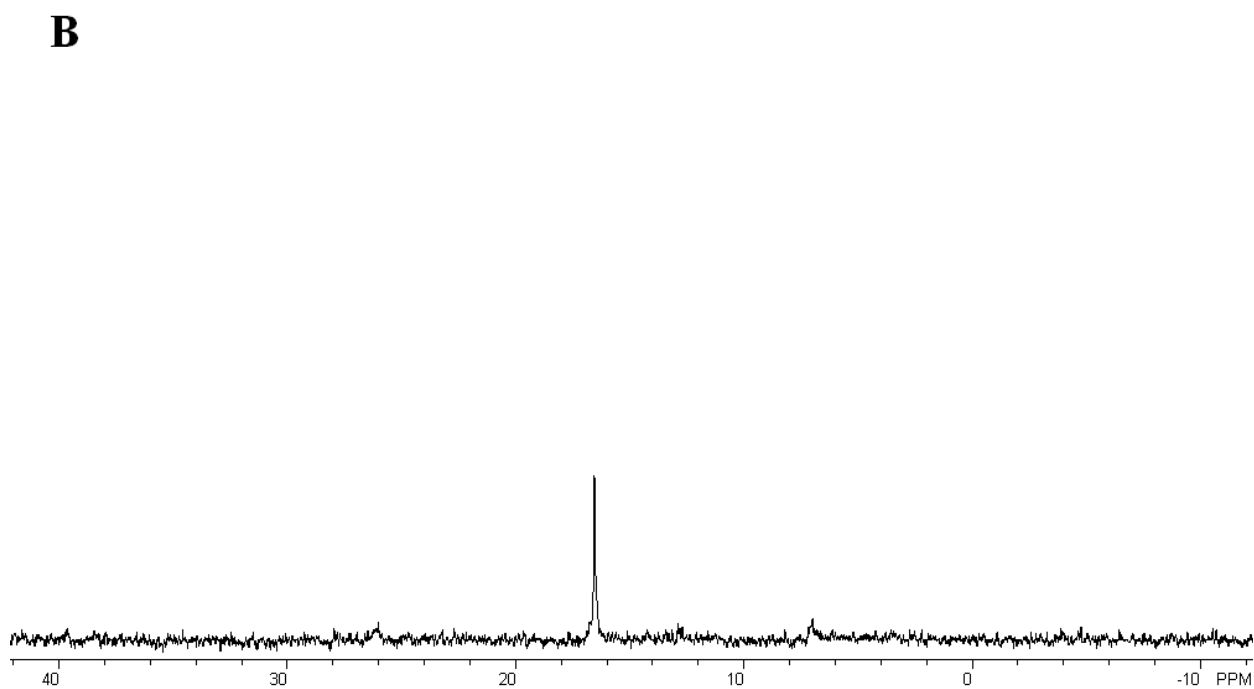

**General procedure for molecular modeling studies:** The structures of metallodendrimers **6a-c** were constructed within the input mode of the program Maestro v8.0.110. Each individual metallodendrimer was then subjected to a 1.0 ns molecular dynamics simulation (1.5 fs time step, GB/SA solvent model for CHCl<sub>3</sub>) at 300 K using the MMFF force field in order to equilibrate their structures. Upon full equilibration, the metallodendrimers were then minimized to full convergence.

**Figure S14.** Simulated molecular model of [G1] six-membered hexagonal metallodendrimer **6a** (hydrogen atoms have been removed for clarity). Internal radius = 1.4 nm; average outer radius = 2.6 nm.

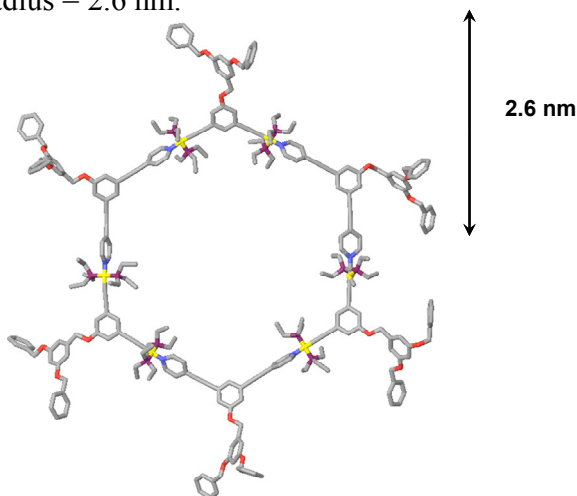

**Figure S15.** Simulated molecular model of [G2] six-membered hexagonal metallodendrimer **6b** (hydrogen atoms have been removed for clarity). Internal radius = 1.4 nm; average outer radius = 3.1 nm.

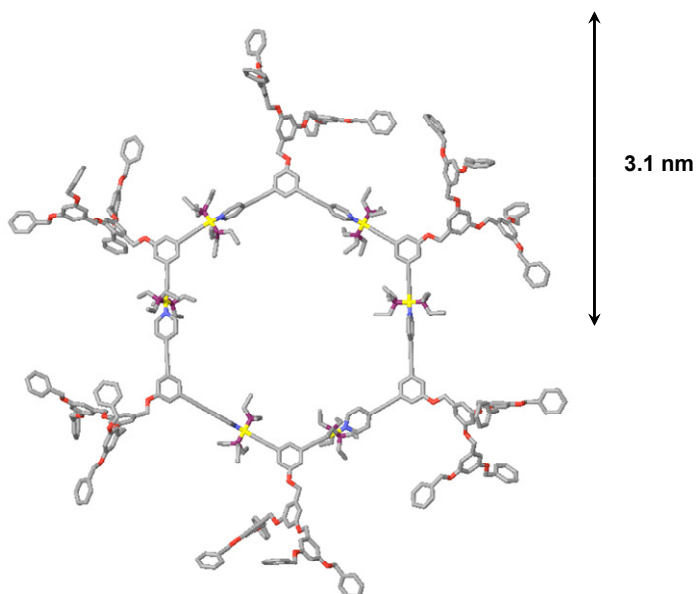

Supplement: NIHMS108633-supplement-1_si_001.pdf [file NIHMS108633-supplement-1_si_001.pdf]
